# Supplementary material for: Zero- to One-Dimensional Zn24 Supraclusters: Synthesis, Structures and Detection Wavelength
Source: MDPI journal article supplement (doi:10.3390/nano13233058), 2023-11-30
Supplement: s1 [file s1]

# Supracluster Zn<sub>24</sub> from 0D to 1D: synthesis, structures and Detection wavelength properties

Yating Chen <sup>1,2</sup>, Zhonghang Chen <sup>1</sup>, Jiming Wang <sup>1</sup>, Xuandi Ma <sup>1</sup>, Linyu Yuan <sup>1</sup>, Shuhua Zhang <sup>1,2,\*</sup> and Fushun Tang <sup>1,\*</sup>

<sup>1</sup> Guangxi Key Laboratory of Electrochemical and Magnetochemical Functional Materials, College of Materials Science and Engineering, Guilin University of Technology, Guilin 541004, China; 1020180460@glut.edu.cn (Y.C.); 1020180495@glut.edu.cn (X.M.)

<sup>2</sup> College of Chemistry, Guangdong University of Petrochemical Technology, Maoming 525000, China

\* Correspondence: zsh720108@163.com (S.Z.); tfushun@glut.edu.cn (F.T.)

## Syntheses

### 1.1 Syntheses of L<sup>n</sup>H<sub>2</sub> (n = 1-5)

#### 1.1.1 Syntheses of L<sup>1</sup>H<sub>2</sub>

A mixture of 5-bromo-2-hydroxybenzaldehyde (20 mmol, 4.0180 g), 5-amino-1,2,3,4-tetrazole (Hatz, 20 mmol, 1.7050 g) and ethanol (20 mL) in a 100 mL flask refluxed at 353 K for 1 h. Beige precipitate appeared and then was rinsed three times with fresh ethanol (10 mL × 3) and dried at 50 °C for 24 h (yield: 5.254 g, *ca.* 75 % based on Hatz). *Anal. Calc.* for L<sup>1</sup>H<sub>2</sub>: C<sub>8</sub>H<sub>6</sub>N<sub>5</sub>OBr, (*Mr* = 268.07), *calc.*: C, 35.83; H, 2.26; N, 26.13 %; Found: C, 35.75; H, 2.34; N, 26.22 %. IR data for L<sup>1</sup>H<sub>2</sub> (KBr, cm<sup>-1</sup>, Fig. S1†): 3378m, 1613s, 1556s, 1470 s, 1275 m, 1174 m, 1064 w, 728 w. <sup>1</sup>H NMR data (DMSO-d<sub>6</sub>, 400 MHz, Fig. S8†) are as follows: δ 10.06 (d, *J* = 11.1 Hz, 1H), 8.16 – 8.05 (m, 2H), 7.90 (dd, *J* = 6.6, 2.4 Hz, 1H), 6.46 (s, 2H).

#### 1.1.2 Syntheses of L<sup>2</sup>H<sub>2</sub>

L<sup>2</sup>H<sub>2</sub> was prepared in a similar way to L<sup>1</sup>H<sub>2</sub>, except that 5-bromo-2-hydroxy-benzaldehyde was replaced by 2-hydroxybenzaldehyde. Beige precipitate appeared and then was rinsed three times with fresh ethanol (10 mL × 3) and dried at 50 °C for 24 h (yield: 3.706 g, *ca.* 98 % based on Hatz). *Anal. Calc.* for L<sup>2</sup>H<sub>2</sub>: C<sub>8</sub>H<sub>7</sub>N<sub>5</sub>O, (*Mr* = 189.17), *calc.*: C, 50.77; H, 3.70; N, 37.02 %; Found: C, 50.74; H, 3.74; N, 37.05 %. IR data for L<sup>2</sup>H<sub>2</sub> (KBr, cm<sup>-1</sup>, Fig. S1†): 3416 w, 1613 s, 1476 m, 1270 m, 1057 s, 759 s. <sup>1</sup>H NMR data (DMSO-d<sub>6</sub>, 400 MHz, Fig. S9†) are as follows: δ 10.71 (s, 1H), 10.26 (d, *J* = 2.2 Hz, 1H), 7.69 – 7.49 (m, 1H), 7.07 – 6.90 (m,

2H), 6.47 (s, 3H).

### 1.1.3 Syntheses of L<sup>3</sup>H<sub>2</sub>

L<sup>3</sup>H<sub>2</sub> was prepared in a similar way to L<sup>1</sup>H<sub>2</sub>, except that 5-bromo-2-hydroxy-benzaldehyde was replaced by 3-methoxy-2-hydroxybenzaldehyde. Beige precipitate appeared and then was rinsed three times with fresh ethanol(10 mL × 3) and dried at 50 °C for 24 h (yield: 4.165 g, *ca.* 95 %, based on Hatz). *Anal. Calc.* for L<sup>3</sup>H<sub>2</sub>: C<sub>9</sub>H<sub>9</sub>N<sub>5</sub>O<sub>2</sub>, (*Mr* = 219.20), *calc.*: C, 49.27; H, 4.11; N, 31.93 %; Found: C, 49.24; H, 4.15; N, 31.96 %. IR data for L<sup>3</sup>H<sub>2</sub> (KBr, cm<sup>-1</sup>, Fig. S1†): 3421 w, 1603 s, 1531 m, 1461 w, 1257 m, 1066 w, 963 m, 762 m. <sup>1</sup>H NMR data (DMSO-d<sub>6</sub>, 400 MHz, Fig. S10†) are as follows: δ 10.25 (d, *J* = 11.4 Hz, 1H), 9.53 (s, 2H), 7.50 (d, *J* = 8.0 Hz, 2H), 7.23 (d, *J* = 7.8 Hz, 2H), 6.94 (dd, *J* = 16.8, 8.7 Hz, 2H).

### 1.1.4 Syntheses of L<sup>4</sup>H<sub>2</sub>

L<sup>4</sup>H<sub>2</sub> was prepared in a similar way to L<sup>1</sup>H<sub>2</sub>, except that 5-bromo-2-hydroxy-benzaldehyde was replaced by 3-ethoxy-2-hydroxybenzaldehyde. Beige precipitate appeared and then was rinsed three times with fresh ethanol(10 mL × 3) and dried at 50 °C for 24 h (yield: 4.286 g, *ca.* 91.9 % based on Hatz). *Anal. Calc.* for L<sup>4</sup>H<sub>2</sub>: C<sub>10</sub>H<sub>11</sub>N<sub>5</sub>O<sub>2</sub>, (*Mr* = 233.23), *calc.*: C, 53.75; H, 4.93; N, 31.35 %; Found: C, 53.68; H, 4.99; N, 31.42 %. IR data for L<sup>4</sup>H<sub>2</sub> (KBr, cm<sup>-1</sup>, Fig. S1†): 3435 w, 3412 s, 1600 s, 1464 s, 1251 s, 774 s. <sup>1</sup>H NMR data (DMSO-d<sub>6</sub>, 400 MHz, Fig. S11†) are as follows: δ 10.30 – 10.21 (m, 1H), 10.14 (s, 1H), 9.52 (s, 1H), 7.48 (d, *J* = 7.9 Hz, 1H), 7.22 (t, *J* = 7.4 Hz, 3H), 6.97 – 6.85 (m, 2H), 6.46 (s, 2H).

### 1.1.2 Syntheses of L<sup>5</sup>H<sub>2</sub>

L<sup>5</sup>H<sub>2</sub> was prepared in a similar way to L<sup>1</sup>H<sub>2</sub>, except that 5-bromo-2-hydroxy-benzaldehyde was replaced by 5-chloro-2-hydroxybenzaldehyde. Beige precipitate appeared and then was rinsed three times with fresh ethanol (10 mL × 3) and dried at 50 °C for 24 h (yield: 4.339 g, *ca.* 97 % based on Hatz). *Anal. Calc.* for L<sup>5</sup>H<sub>2</sub>: C<sub>8</sub>H<sub>6</sub>N<sub>5</sub>OCl (*Mr* = 223.62), *calc.*: C, 42.93; H, 2.68; N, 31.30 %; Found: C, 42.90; H, 2.72; N, 31.33 %. IR data for L<sup>5</sup>H<sub>2</sub> (KBr, cm<sup>-1</sup>, Fig. S1†): 3331 w, 1648 s, 1476 m, 1269 s, 1059 s, 731 m. <sup>1</sup>H NMR data (DMSO-d<sub>6</sub>, 400 MHz, Fig. S12†) are as follows: δ 10.13 (s, 1H), 9.53 (s, 1H), 8.01 – 7.81 (m, 3H), 7.71 (d, *J* = 2.5 Hz, 1H).

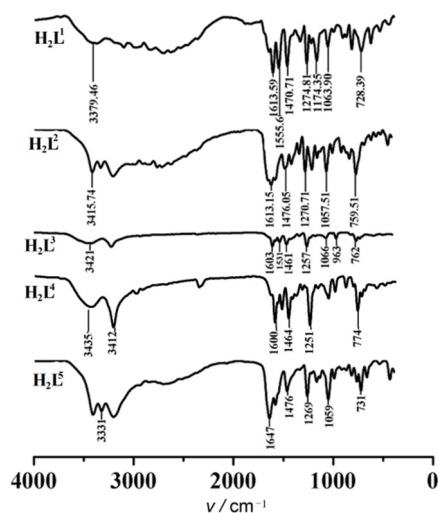

Figure S1. IR of  $H_2L^1$ - $H_2L^5$

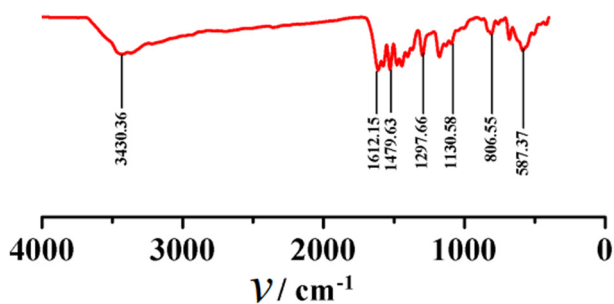

Figure S2. IR of  $Zn_{24}$ .

Table S1. Selected bond lengths (Å) and angles (°) for  $Zn_{24}$

|                      |          |                      |          |
|----------------------|----------|----------------------|----------|
| Zn9—N9               | 2.182(6) | Zn9—O30              | 2.004(6) |
| Zn9—N33              | 2.142(6) | Zn3—N10              | 2.117(6) |
| Zn9—N13              | 2.201(6) | Zn3—N34              | 2.206(6) |
| Zn9—O21              | 2.085(6) | Zn3—N11              | 2.211(6) |
| Zn9—N37              | 2.238(6) | Zn3—N17              | 2.209(7) |
| Zn3—O5               | 2.094(6) | Zn5—O8               | 2.002(7) |
| Zn3—O7               | 2.009(6) | Zn5—O9               | 2.079(6) |
| Zn5—N18              | 2.248(6) | Zn5—N44 <sup>i</sup> | 2.141(6) |
| Zn5—N31              | 2.159(6) | Zn8—N32              | 2.163(6) |
| Zn5—N22              | 2.182(6) | Zn8—O16              | 2.063(6) |
| Zn8—O17              | 1.992(6) | Zn11—N8              | 2.173(6) |
| Zn8—N23              | 2.200(6) | Zn11—N4              | 2.210(7) |
| Zn8—N27              | 2.231(7) | Zn11—N38             | 2.224(6) |
| Zn8—N43 <sup>i</sup> | 2.186(6) | Zn11—O29             | 2.003(8) |
| Zn11—N41             | 2.122(6) | Zn11—O28             | 2.037(7) |
| Zn2—N42              | 2.175(6) | Zn2—O18 <sup>i</sup> | 2.019(6) |
| Zn2—N7               | 2.153(6) | Zn7—N26              | 2.043(7) |
| Zn2—N3               | 2.215(7) | Zn7—N24              | 2.053(7) |
| Zn2—O4               | 2.069(6) | Zn7—O15              | 1.929(8) |
| Zn2—N28 <sup>i</sup> | 2.215(6) | Zn7—O13              | 2.143(8) |

|                           |           |                           |           |
|---------------------------|-----------|---------------------------|-----------|
| Zn7—O14                   | 2.109(10) | Zn10—N14                  | 2.034(7)  |
| Zn6—N21                   | 2.045(7)  | Zn10—N36                  | 2.029(7)  |
| Zn6—N19                   | 2.019(7)  | Zn10—O22                  | 1.914(8)  |
| Zn6—O10                   | 1.938(7)  | Zn10—O23                  | 1.998(10) |
| Zn6—O12                   | 1.927(8)  | Zn10—O24                  | 2.436(17) |
| Zn6—O11                   | 2.495(2)  | Zn4—O5                    | 2.818(7)  |
| Zn4—N16                   | 2.113(7)  | Zn12—N5                   | 2.057(8)  |
| Zn4—N12                   | 2.045(7)  | Zn12—N39                  | 2.080(8)  |
| Zn4—O6                    | 1.951(9)  | Zn12—O27                  | 1.946(9)  |
| Zn4—O19                   | 1.962(8)  | Zn12—O26                  | 2.223(8)  |
| Zn4—O20                   | 2.44(2)   | Zn12—O25                  | 2.061(14) |
| Zn1—N2                    | 2.039(8)  | Zn12—O28                  | 2.818(9)  |
| Zn1—N29 <sup>i</sup>      | 2.048(7)  | Zn1—O3                    | 1.937(9)  |
| Zn1—O1                    | 2.495(2)  | Zn1—O2                    | 2.021(11) |
| N33—Zn9—N13               | 89.9(2)   |                           |           |
| N9—Zn9—N13                | 89.5(2)   | N33—Zn9—N37               | 176.3(2)  |
| N9—Zn9—N37                | 85.5(2)   | O21—Zn9—N13               | 85.1(3)   |
| N33—Zn9—N9                | 91.1(2)   | O21—Zn9—N37               | 90.5(3)   |
| N13—Zn9—N37               | 88.5(3)   | O30—Zn9—N13               | 168.2(3)  |
| O21—Zn9—N9                | 173.4 (3) | O30—Zn9—N37               | 93.1(3)   |
| O21—Zn9—N33               | 92.7(3)   | N10—Zn3—N34               | 90.0(2)   |
| O30—Zn9—N9                | 102.3(3)  | N10—Zn3—N11               | 90.5(2)   |
| O30—Zn9—N33               | 89.2(3)   | N10—Zn3—N17               | 175.8(2)  |
| O30—Zn9—O21               | 83.2(3)   | N17—Zn3—N11               | 88.5(2)   |
| N34—Zn3—N11               | 89.1(2)   | O5—Zn3—N10                | 93.3(3)   |
| N34—Zn3—N17               | 85.9(2)   | O5—Zn3—N34                | 171.4(3)  |
| O5—Zn3—N34                | 171.4(3)  | O7—Zn3—N10                | 89.5(3)   |
| O5—Zn3—N11                | 82.9(3)   | O7—Zn3—N34                | 103.0(3)  |
| O5—Zn3—N17                | 90.7(3)   | O8—Zn5—N18                | 92.7(3)   |
| O7—Zn3—N11                | 167.9(3)  | O8—Zn5—N31                | 99.4(3)   |
| O7—Zn3—N17                | 92.3(3)   | O9—Zn5—N18                | 92.4(2)   |
| O7—Zn3—O5                 | 85.0(3)   | N32—Zn8—N23               | 90.6(2)   |
| N31—Zn5—N18               | 86.8(2)   | N32—Zn8—N27               | 177.6(2)  |
| N31—Zn5—N22               | 90.2(2)   | O17—Zn8—N32               | 88.3(2)   |
| N22—Zn5—N18               | 89.4(2)   | N23—Zn8—N27               | 88.7(2)   |
| O8—Zn5—N22                | 170.2(3)  | N43 <sup>i</sup> —Zn8—N23 | 88.8(2)   |
| O8—Zn5—O9                 | 84.3(3)   | N41—Zn11—N4               | 90.8(2)   |
| O8—Zn5—N44 <sup>i</sup>   | 88.9(2)   | N32—Zn8—N43 <sup>i</sup>  | 90.2(2)   |
| O9—Zn5—N44 <sup>i</sup>   | 89.9(3)   | O16—Zn8—N32               | 92.6(3)   |
| N44 <sup>i</sup> —Zn5—N18 | 177.4(2)  | O16—Zn8—N23               | 84.4(3)   |
| N44 <sup>i</sup> —Zn5—N31 | 90.8(2)   | O16—Zn8—N27               | 89.7(3)   |
| N44 <sup>i</sup> —Zn5—N22 | 89.3(2)   | O16—Zn8—N43 <sup>i</sup>  | 172.6(2)  |
| O29—Zn11—N38              | 92.2(3)   | O17—Zn8—O16               | 86.0(3)   |
| O29—Zn11—O28              | 84.5(4)   | O17—Zn8—N23               | 170.3(2)  |
| N43 <sup>i</sup> —Zn8—N27 | 87.4(2)   | O17—Zn8—N27               | 92.8(3)   |
| N41—Zn11—N8               | 90.9(2)   | O17—Zn8—N43 <sup>i</sup>  | 100.9(2)  |
| N41—Zn11—N38              | 176.5(3)  | O28—Zn11—N41              | 91.9(3)   |
| N8—Zn11—N4                | 89.5(2)   | O28—Zn11—N8               | 173.1(3)  |
| N8—Zn11—N38               | 85.8(2)   | O28—Zn11—N4               | 84.2(4)   |

|                                        |          |                          |          |
|----------------------------------------|----------|--------------------------|----------|
| N4—Zn11—N38                            | 88.0(2)  | O28—Zn11—N38             | 91.2(3)  |
| O29—Zn11—N41                           | 89.6(3)  | O4—Zn2—N3                | 88.2(3)  |
| O29—Zn11—N8                            | 101.8(3) | O4—Zn2—N28 <sup>i</sup>  | 91.5(3)  |
| O29—Zn11—N4                            | 168.7(3) | N28 <sup>i</sup> —Zn2—N3 | 89.1(3)  |
| N42—Zn2—N3                             | 89.2(2)  | N24—Zn7—O14              | 133.1(5) |
| N7—Zn2—N42                             | 91.0(2)  | O15—Zn7—O14              | 111.7(6) |
| N7—Zn2—N3                              | 89.0(2)  | N19—Zn6—N21              | 99.5(3)  |
| N7—Zn2—N28 <sup>i</sup>                | 177.3(3) | O10—Zn6—N21              | 108.8(3) |
| O4—Zn2—N42                             | 177.0(3) | O12—Zn6—O10              | 109.8(4) |
| O4—Zn2—N7                              | 90.4(3)  | O22—Zn10—N14             | 114.6(4) |
| O18 <sup>i</sup> —Zn2—N42              | 96.9(3)  | O22—Zn10—N36             | 104.9(4) |
| O18 <sup>i</sup> —Zn2—N7               | 87.6(3)  | N16—Zn4—O20              | 139.1(6) |
| O18 <sup>i</sup> —Zn2—N3               | 173.0(3) | N12—Zn4—N16              | 96.6(3)  |
| O18 <sup>i</sup> —Zn2—O4               | 85.7(3)  | N12—Zn4—O20              | 93.6(5)  |
| O18 <sup>i</sup> —Zn2—N28 <sup>i</sup> | 94.4(3)  | O6—Zn4—N16               | 98.8(4)  |
| N26—Zn7—N24                            | 99.9(3)  | O6—Zn4—N12               | 121.3(4) |
| N26—Zn7—O13                            | 135.6(3) | O19—Zn4—O20              | 50.5(6)  |
| N26—Zn7—O14                            | 90.5(4)  | N5—Zn12—N39              | 95.6(3)  |
| N24—Zn7—O13                            | 91.5(3)  | N5—Zn12—O26              | 97.9(3)  |
| O15—Zn7—N26                            | 112.8(4) | O27—Zn12—O26             | 97.2(3)  |
| O15—Zn7—N24                            | 106.0(4) | O27—Zn12—O25             | 98.7(6)  |
| O15—Zn7—O13                            | 104.7(3) | O25—Zn12—N39             | 92.1(4)  |
| O14—Zn7—O13                            | 53.0(3)  | O2—Zn1—N29 <sup>i</sup>  | 95.7(4)  |
| O10—Zn6—N19                            | 111.6(3) | N2—Zn1—N29 <sup>i</sup>  | 100.2(3) |
| O12—Zn6—N21                            | 98.7(3)  | O3—Zn1—N2                | 105.3(4) |
| O12—Zn6—N19                            | 125.8(4) | O3—Zn1—O2                | 104.7(5) |
| N14—Zn10—O24                           | 143.5(4) | O3—Zn1—N29 <sup>i</sup>  | 111.6(4) |
| N36—Zn10—N14                           | 99.3(3)  | O2—Zn1—N2                | 137.7(5) |
| N36—Zn10—O24                           | 91.3(4)  | N5—Zn12—O25              | 135.9(6) |
| O22—Zn10—O23                           | 111.2(6) | N39—Zn12—O26             | 144.6(3) |
| O22—Zn10—O24                           | 95.8(5)  | O27—Zn12—N5              | 121.4(4) |
| O23—Zn10—N14                           | 97.1(4)  | O27—Zn12—N39             | 103.3(4) |
| O23—Zn10—N36                           | 129.0(6) | O25—Zn12—O26             | 56.1(5)  |
| O23—Zn10—O24                           | 51.2(5)  | O19—Zn4—N16              | 93.9(4)  |
| O6—Zn4—O19                             | 106.1(4) | O19—Zn4—N12              | 128.9(4) |
| O6—Zn4—O20                             | 109.2(6) |                          |          |

Symmetry codes: (i)  $\neg x, \neg y, \neg z$ .

Table S2. Selected bond lengths (Å) and angles (°) for **1-D** $\subset$ **Zn<sub>24</sub>**

|         |           |         |           |
|---------|-----------|---------|-----------|
| Zn1—O2  | 1.83(2)   | Zn1—O3  | 1.908(17) |
| Zn1—O3' | 1.962(17) | Zn1—N1  | 2.055(7)  |
| Zn1—O2' | 2.092(17) | Zn1—N11 | 2.120(7)  |
| Zn1—O33 | 2.341(10) | Zn2—O5  | 2.039(7)  |
| Zn2—N6  | 2.099(6)  | Zn2—N17 | 2.195(6)  |
| Zn2—N12 | 2.197(6)  | Zn2—N2  | 2.211(6)  |
| Zn3—O6  | 1.998(6)  | Zn3—O9  | 2.093(6)  |
| Zn3—N26 | 2.125(6)  | Zn3—N18 | 2.161(6)  |
| Zn3—N22 | 2.178(6)  | Zn3—N13 | 2.264(6)  |
| Zn4—O10 | 1.927(7)  | Zn4—O7' | 1.986(18) |

|                                      |           |                           |           |
|--------------------------------------|-----------|---------------------------|-----------|
| Zn4—N14                              | 2.002(6)  | Zn4—O8                    | 2.01(3)   |
| Zn4—N21                              | 2.073(7)  | Zn5—O15                   | 1.956(6)  |
| Zn5—O14                              | 2.030(7)  | Zn5—N24                   | 2.088(7)  |
| Zn5—O30 <sup>ii</sup>                | 2.129(6)  | Zn5—N31                   | 2.214(6)  |
| Zn6—O11                              | 2.027(5)  | Zn6—O13                   | 2.102(6)  |
| Zn6—N19                              | 2.130(6)  | Zn6—N32                   | 2.171(6)  |
| Zn6—N27                              | 2.224(6)  | Zn6—N23                   | 2.233(6)  |
| Zn7—O12                              | 2.008(6)  | Zn7—N17                   | 2.092(6)  |
| Zn7—N9 <sup>i</sup>                  | 2.149(6)  | Zn7—N28                   | 2.162(6)  |
| Zn7—N38                              | 2.179(6)  | Zn7—N33                   | 2.211(6)  |
| Zn8—O19                              | 1.92(2)   | Zn8—O18                   | 1.936(6)  |
| Zn8—O20 <sup>i</sup>                 | 1.94(2)   | Zn8—N39                   | 2.030(7)  |
| Zn8—N34                              | 2.054(6)  | Zn8—O20                   | 2.48(2)   |
| Zn9—O22 <sup>i</sup>                 | 1.932(15) | Zn9—O23                   | 1.939(6)  |
| Zn9—O21                              | 2.01(3)   | Zn9—N44                   | 2.050(6)  |
| Zn9—N36                              | 2.050(6)  | Zn10—O25                  | 2.015(6)  |
| Zn10—O24                             | 2.077(6)  | Zn10—N29                  | 2.131(6)  |
| Zn10—N8 <sup>i</sup>                 | 2.165(6)  | Zn10—N43                  | 2.201(6)  |
| Zn10—N37                             | 2.232(6)  | Zn11—O26                  | 2.021(6)  |
| Zn11—O27                             | 2.033(6)  | Zn11—N3 <sup>i</sup>      | 2.162(6)  |
| Zn11—N16 <sup>i</sup>                | 2.179(6)  | Zn11—N7 <sup>i</sup>      | 2.214(6)  |
| Zn11—N42                             | 2.220(6)  | Zn12—O28                  | 2.000(7)  |
| Zn12—O29                             | 2.066(6)  | Zn12—N41                  | 2.129(6)  |
| Zn12—N4 <sup>i</sup>                 | 2.151(7)  | Zn12—O32                  | 2.209(6)  |
| Zn12—O31                             | 2.222(7)  |                           |           |
| O2—Zn1—O3                            | 108.6 (9) | O2—Zn1—N1                 | 115.7 (7) |
| O3—Zn1—N1                            | 128.1 (7) | O3 <sup>′</sup> —Zn1—N1   | 96.2 (6)  |
| O3 <sup>′</sup> —Zn1—O2 <sup>′</sup> | 124.5 (7) | N1—Zn1—O2 <sup>′</sup>    | 124.5 (7) |
| N1—Zn1—O2 <sup>′</sup>               | 130.3 (5) | O2—Zn1—N11                | 112.4 (7) |
| O3—Zn1—N11                           | 92.1 (5)  | O3 <sup>′</sup> —Zn1—N11  | 114.7 (6) |
| N1—Zn1—N11                           | 94.9 (3)  | O2 <sup>′</sup> —Zn1—N11  | 92.4 (5)  |
| O2—Zn1—O33                           | 58.6 (10) | O3—Zn1—O33                | 98.2 (9)  |
| O3 <sup>′</sup> —Zn1—O33             | 77.2 (10) | N1—Zn1—O33                | 83.4 (8)  |
| O2 <sup>′</sup> —Zn1—O33             | 168.1 (8) | O6—Zn3—O9                 | 81.9 (3)  |
| O6—Zn3—N26                           | 88.7 (3)  | O9—Zn3—N26                | 90.1 (2)  |
| O6—Zn3—N18                           | 99.8 (3)  | O9—Zn3—N18                | 178.1 (2) |
| N26—Zn3—N18                          | 90.9 (2)  | O6—Zn3—N22                | 169.3 (3) |
| O9—Zn3—N22                           | 87.6 (3)  | N26—Zn3—N22               | 89.6 (2)  |
| N18—Zn3—N22                          | 90.8 (2)  | O6—Zn3—N13                | 93.9 (2)  |
| O9—Zn3—N13                           | 93.6 (2)  | N26—Zn3—N13               | 175.8 (2) |
| N18—Zn3—N13                          | 85.4 (2)  | N22—Zn3—N13               | 88.5 (2)  |
| O10—Zn4—O7 <sup>′</sup>              | 95.4 (6)  | O10—Zn4—N14               | 114.3 (3) |
| O10—Zn4—O8                           | 127.2 (7) | O7 <sup>′</sup> —Zn4—N14  | 115.7 (7) |
| O7 <sup>′</sup> —Zn4—O8              | 104.0 (3) | O7 <sup>′</sup> —Zn4—N21  | 128.4 (7) |
| N14—Zn4—N21                          | 99.0 (3)  | O8—Zn4—N21                | 107.4 (7) |
| O15—Zn5—O14                          | 108.2 (3) | O15—Zn5—N24               | 120.2 (3) |
| O14—Zn5—N24                          | 131.6 (2) | O15—Zn5—O30 <sup>ii</sup> | 102.1 (3) |
| O14—Zn5—O30 <sup>ii</sup>            | 87.7 (3)  | N24—Zn5—O30 <sup>ii</sup> | 84.0 (2)  |
| O15—Zn5—N31                          | 87.4 (3)  | N24—Zn5—N31               | 92.2 (2)  |

|                                        |           |                                       |           |
|----------------------------------------|-----------|---------------------------------------|-----------|
| O30 <sup>ii</sup> —Zn5—N31             | 169.3 (2) | O11—Zn6—O13                           | 86.9 (2)  |
| O11—Zn6—N19                            | 90.1 (2)  | O13—Zn6—N19                           | 94.0 (2)  |
| O11—Zn6—N32                            | 91.8 (2)  | O13—Zn6—N32                           | 89.6 (2)  |
| N19—Zn6—N32                            | 176.0 (2) | O11—Zn6—N27                           | 104.3 (2) |
| O13—Zn6—N27                            | 167.9 (2) | N19—Zn6—N27                           | 90.5 (2)  |
| N32—Zn6—N27                            | 85.6 (2)  | O11—Zn6—N23                           | 167.9 (2) |
| O13—Zn6—N23                            | 81.0 (2)  | N19—Zn6—N23                           | 90.3 (2)  |
| N32—Zn6—N23                            | 88.6 (2)  | N27—Zn6—N23                           | 87.8 (2)  |
| O12—Zn7—O17                            | 85.6 (3)  | O12—Zn7—N9 <sup>i</sup>               | 88.7 (2)  |
| O17—Zn7—N9 <sup>i</sup>                | 90.7 (2)  | O12—Zn7—N28                           | 95.1 (3)  |
| O17—Zn7—N28                            | 178.0 (2) | N9 <sup>i</sup> —Zn7—N28              | 91.1 (2)  |
| O12—Zn7—N38                            | 172.6 (2) | O17—Zn7—N38                           | 87.8 (2)  |
| N9 <sup>i</sup> —Zn7—N38               | 88.0 (2)  | N28—Zn7—N38                           | 91.5 (2)  |
| O12—Zn7—N33                            | 95.2 (2)  | O17—Zn7—N33                           | 90.9 (2)  |
| N9 <sup>i</sup> —Zn7—N33               | 175.8 (2) | N28—Zn7—N33                           | 87.2 (2)  |
| N38—Zn7—N33                            | 88.2 (2)  | O19—Zn8—O18                           | 117.8 (6) |
| O18—Zn8—O20 <sup>′</sup>               | 111.0 (7) | O19—Zn8—N39                           | 121.1 (7) |
| O18—Zn8—N39                            | 113.9 (2) | O20 <sup>′</sup> —Zn8—N39             | 97.9 (6)  |
| O19—Zn8—N34                            | 93.0 (5)  | O18—Zn8—N34                           | 106.2 (3) |
| O20 <sup>′</sup> —Zn8—N34              | 128.7 (7) | N39—Zn8—N34                           | 98.1 (3)  |
| O19—Zn8—O20                            | 58.9 (7)  | O18—Zn8—O20                           | 92.2 (5)  |
| N39—Zn8—O20                            | 151.6 (5) | O22 <sup>′</sup> —Zn9—O23             | 115.3 (6) |
| O23—Zn9—O21                            | 103.8 (7) | O22 <sup>′</sup> —Zn9—N44             | 97.7 (5)  |
| O23—Zn9—N44                            | 117.0 (3) | O21—Zn9—N44                           | 133.0 (8) |
| O22 <sup>′</sup> —Zn9—N36              | 125.4 (7) | O23—Zn9—N36                           | 102.9 (3) |
| O21—Zn9—N36                            | 94.7 (8)  | N44—Zn9—N36                           | 97.9 (3)  |
| O25—Zn10—O24                           | 82.5 (2)  | O25—Zn10—N29                          | 89.8 (2)  |
| O24—Zn10—N29                           | 89.2 (2)  | O25—Zn10—N8 <sup>i</sup>              | 104.6 (2) |
| O24—Zn10—N8 <sup>i</sup>               | 172.9 (2) | N29—Zn10—N8 <sup>i</sup>              | 91.6 (2)  |
| O25—Zn10—N43                           | 90.8 (2)  | O24—Zn10—N43                          | 92.1 (2)  |
| N29—Zn10—N43                           | 178.6 (2) | N8 <sup>i</sup> —Zn10—N43             | 87.1 (2)  |
| O25—Zn10—N37                           | 167.8 (2) | O24—Zn10—N37                          | 85.3 (2)  |
| N29—Zn10—N37                           | 90.2 (2)  | N8 <sup>i</sup> —Zn10—N37             | 87.7 (2)  |
| N43—Zn10—N37                           | 89.5 (2)  | O26—Zn11—O27                          | 84.4 (3)  |
| O26—Zn11—N3 <sup>i</sup>               | 172.8 (2) | O27—Zn11—N3 <sup>i</sup>              | 91.5 (3)  |
| O26—Zn11—N16 <sup>i</sup>              | 85.1 (2)  | O27—Zn11—N16 <sup>i</sup>             | 89.1 (2)  |
| N3 <sup>i</sup> —Zn11—N16 <sup>i</sup> | 88.9 (2)  | O26—Zn11—N7 <sup>i</sup>              | 93.1 (3)  |
| O27—Zn11—N7 <sup>i</sup>               | 177.1 (2) | N3 <sup>i</sup> —Zn11—N7 <sup>i</sup> | 90.8 (2)  |
| N16 <sup>i</sup> —Zn11—N7 <sup>i</sup> | 89.2 (2)  | O26—Zn11—N42                          | 95.6 (2)  |
| O27—Zn11—N42                           | 95.1 (2)  | N3 <sup>i</sup> —Zn11—N42             | 90.7 (2)  |
| N16 <sup>i</sup> —Zn11—N42             | 175.8 (2) | N7 <sup>i</sup> —Zn11—N42             | 86.6 (2)  |
| O28—Zn12—O29                           | 167.7 (3) | O28—Zn12—N41                          | 97.7 (3)  |
| O29—Zn12—N41                           | 87.8 (3)  | O28—Zn12—N4 <sup>i</sup>              | 100.6 (3) |
| O29—Zn12—N4 <sup>i</sup>               | 89.7 (3)  | N41—Zn12—N4 <sup>i</sup>              | 95.5 (3)  |
| O28—Zn12—O32                           | 88.2 (3)  | O29—Zn12—O32                          | 85.2 (2)  |
| N41—Zn12—O32                           | 171.3 (2) | N4 <sup>i</sup> —Zn12—O32             | 89.6 (3)  |
| O28—Zn12—O31                           | 83.5 (3)  | O29—Zn12—O31                          | 85.6 (3)  |
| N41—Zn12—O31                           | 88.9 (3)  | N4 <sup>i</sup> —Zn12—O31             | 173.4 (3) |

O32—Zn12—O31 85.4 (2)  
Symmetry codes: (i)  $-x+1, -y+1, -z+1$ ; (ii)  $x, y, z+1$ ; (iii)  $x, y, z-1$ .

Table S3 Hydrogen bond lengths (Å) and angles (°) for **Zn<sub>24</sub>**

| $D-H\cdots A$                      | $D-H$  | $H\cdots A$ | $D\cdots A$ | $D-H\cdots A$ |
|------------------------------------|--------|-------------|-------------|---------------|
| N1—H1A $\cdots$ O1                 | 0.8600 | 2.1300      | 2.9292      | 155.00        |
| N1—H1B $\cdots$ O26                | 0.8600 | 2.3900      | 3.1249      | 144.00        |
| N6—H6A $\cdots$ O7                 | 0.8600 | 2.3100      | 2.8830      | 124.00        |
| N6—H6B $\cdots$ O4                 | 0.8600 | 2.4300      | 3.0666      | 131.00        |
| N6—H6B $\cdots$ O18                | 0.8600 | 2.4600      | 2.9979      | 121.00        |
| N15—H15A $\cdots$ O20              | 0.8600 | 2.0700      | 2.8696      | 154.00        |
| N15—H15B $\cdots$ O23              | 0.8600 | 2.2100      | 2.9593      | 146.00        |
| N20—H20A $\cdots$ O19              | 0.8600 | 2.1300      | 2.8842      | 146.00        |
| N20—H20B $\cdots$ O11              | 0.8600 | 2.0400      | 2.8427      | 156.00        |
| N25—H25A $\cdots$ O13              | 0.8600 | 2.0500      | 2.8121      | 148.00        |
| N25—H25B $\cdots$ O12 <sup>i</sup> | 0.8600 | 2.2500      | 3.0047      | 146.00        |
| N30—H30A $\cdots$ O14              | 0.8600 | 1.9400      | 2.7042      | 147.00        |
| N30—H30B $\cdots$ O2               | 0.8600 | 2.1300      | 2.8987      | 148.00        |
| N35—H35A $\cdots$ O17 <sup>i</sup> | 0.8600 | 2.3600      | 2.9156      | 123.00        |
| N35—H35B $\cdots$ O21              | 0.8600 | 2.5800      | 3.2182      | 132.00        |
| N35—H35B $\cdots$ O30              | 0.8600 | 2.3800      | 2.9499      | 125.00        |
| N40—H40A $\cdots$ O25              | 0.8600 | 2.0900      | 2.8396      | 145.00        |
| N40—H40B $\cdots$ O24              | 0.8600 | 2.0300      | 2.8168      | 152.00        |
| N45—H45A $\cdots$ O29              | 0.8600 | 2.2500      | 2.8589      | 128.00        |
| N45—H45B $\cdots$ O9               | 0.8600 | 2.5000      | 3.0955      | 128.00        |
| N45—H45B $\cdots$ O8 <sup>i</sup>  | 0.8600 | 2.3500      | 2.9337      | 125.00        |

Symmetry code: (i)  $-x+1, -y+1, -z+1$ .

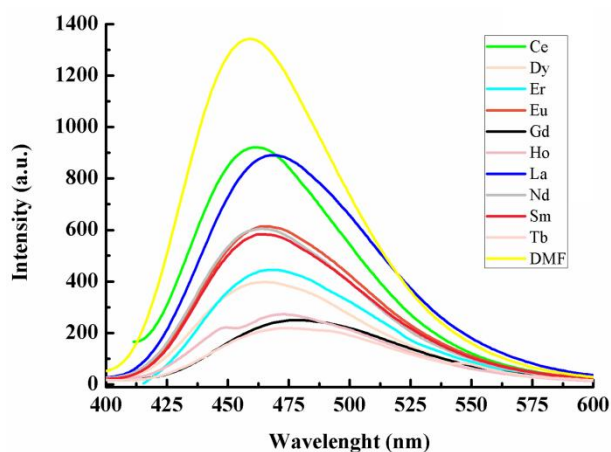

Figure S3. The liquid-state fluorescence behaviors of **Zn<sub>24</sub>** in DMF.



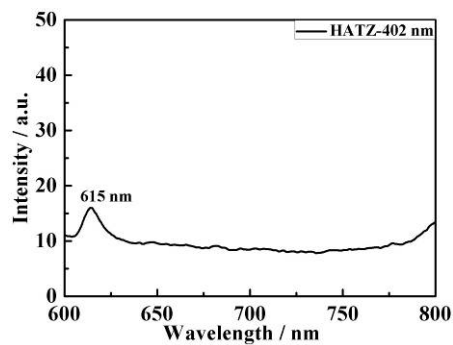

Figure S4. Emission spectra of HATZ in a solid state at 402 nm excitation wavelength at room temperature.

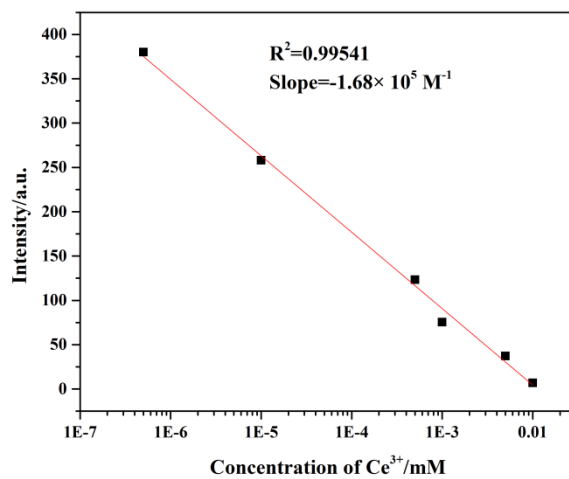

Linear Equation:  $y = -167.880x - 86.209$ ;  $R^2 = 0.9954$ ; Slope =  $-1.68 \times 10^5 \text{ M}^{-1}$ ;  $\delta = 4.77$  (N=12)

Figure S5 The fitting curve of the luminescence intensity of **Zn<sub>24</sub>** at different  $\text{Ce}^{3+}$  concentration

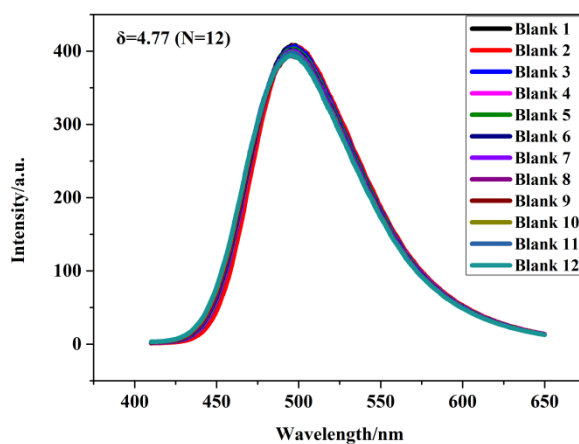

Figure S6 The fluorescence spectra of blank **Zn<sub>24</sub>** ( $1 \text{ mg} \cdot \text{mL}^{-1}$ ) at different measurements.

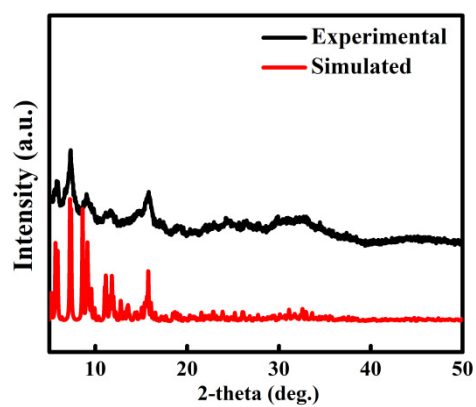

Figure S7 XRD of the complex **Zn<sub>24</sub>**

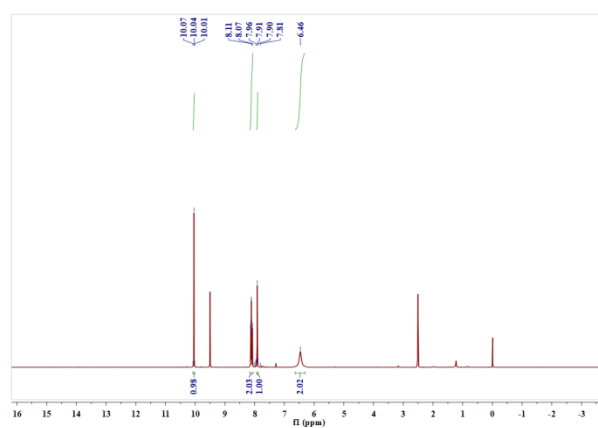

Figure S8 <sup>1</sup>H NMR (400MHz, DMSO-*d*<sub>6</sub>) for **L<sup>1</sup>H<sub>2</sub>**.

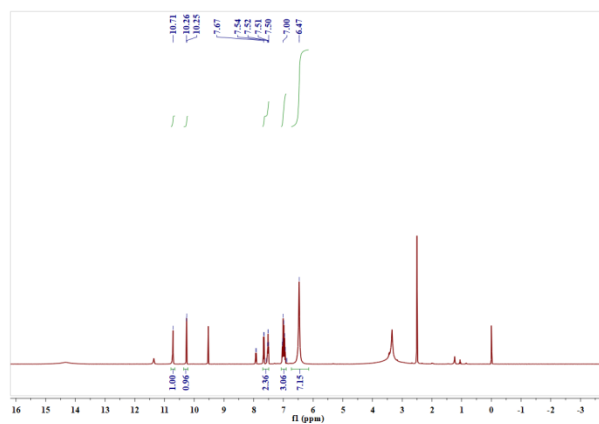

Figure S9 <sup>1</sup>H NMR (400MHz, DMSO-*d*<sub>6</sub>) for **L<sup>2</sup>H<sub>2</sub>**.

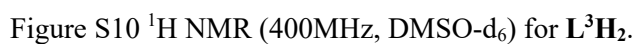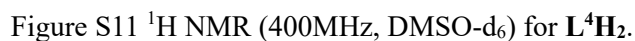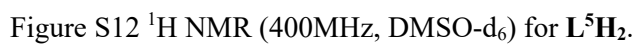

Electronic Supplementary Information (ESI) available: The CCDC numbers for **Zn<sub>24</sub>** and 1D chain **1-D-C-Zn<sub>24</sub>** supracusters were 2284553 and 2284554, respectively. The data can be obtained free of charge at <http://www.ccdc.cam.ac.uk>, or from the Cambridge Crystallographic Data Centre, 12 Union Road, Cambridge CB21EZ, UK (Fax: +44-1223-336-033; E-mail: [deposit@ccdc.cam.ac.uk](mailto:deposit@ccdc.cam.ac.uk)).
